# Supplementary material for: Quantification of Influenza Virus RNA in Aerosols in Patient Rooms
Source: PubMed Central journal article supplement (PMC4743992; doi:10.1371/journal.pone.0148669), 2016-02-05
Supplement: pone.0148669.s001.pdf [file pone.0148669.s001.pdf]

| Identifier | Position of device | Distance (m) of device from |           |                | Curtain    | Influenza A virus recovered in air (copies/m <sup>3</sup> air) |                |            |            |                  |           |           |           |  |
|------------|--------------------|-----------------------------|-----------|----------------|------------|----------------------------------------------------------------|----------------|------------|------------|------------------|-----------|-----------|-----------|--|
|            |                    | Sampling bed                | Other bed | Sampler at 60" |            |                                                                | Sampler at 40" |            |            | Negative control |           |           |           |  |
|            |                    |                             |           | particles      |            | particles                                                      | particles      | particles  | particles  | particles        | particles | particles | particles |  |
|            |                    |                             |           | >4 µm          |            | 1-4 µm                                                         | <1 µm          | >4 µm      | 1-4 µm     | <1 µm            | >4 µm     | 1-4 µm    | <1 µm     |  |
| 1          | -                  | -                           | -         | Changed        | 0          | 0                                                              | 0              | 383 (36.7) | 0          | 0                | -         | -         | -         |  |
| 2          | Centre             | 0.85                        | 1.55      | Enclosed       | 166 (38.0) | 0                                                              | 0              | -          | -          | -                | -         | -         | -         |  |
| 3          | Side               | 0.90                        | 3.20      | Enclosed       | 94 (38.9)  | 0                                                              | 0              | -          | -          | -                | -         | -         | -         |  |
| 4          | Side               | 0.90                        | 3.20      | Enclosed       | 105 (38.7) | 0                                                              | 0              | 0          | 0          | 0                | -         | -         | -         |  |
| 5          | Side               | 1.00                        | 3.20      | Changed        | 0          | 0                                                              | 0              | 0          | 144 (38.2) | 0                | -         | -         | -         |  |
| 6          | Centre             | 0.80                        | 1.60      | Enclosed       | 0          | 0                                                              | 0              | 0          | 0          | 0                | -         | -         | -         |  |
| 7          | Side               | 1.00                        | 3.20      | Enclosed       | 0          | 0                                                              | 0              | -          | -          | -                | -         | -         | -         |  |
| 8          | Changed            | -                           | -         | Enclosed       | 0          | 0                                                              | 0              | 0          | 0          | 0                | 0         | 0         | 0         |  |
| 9          | Centre             | 0.85                        | 1.55      | Not enclosed   | 0          | 0                                                              | 0              | 0          | 0          | 0                | 0         | 0         | 0         |  |
| 10         | Centre             | 0.85                        | 1.55      | Not enclosed   | 0          | 0                                                              | 0              | 0          | 0          | 0                | -         | -         | -         |  |
| 11         | -                  | -                           | -         | Changed        | 0          | 0                                                              | 0              | 0          | 0          | 0                | 0         | 0         | 0         |  |
| 12         | -                  | -                           | -         | Changed        | 0          | 0                                                              | 0              | 0          | 0          | 0                | 0         | 0         | 0         |  |
| 13         | -                  | -                           | -         | Changed        | 0          | 0                                                              | 0              | 0          | 0          | 0                | 0         | 0         | 0         |  |
| 14         | Side               | 1.00                        | 3.20      | Enclosed       | 0          | 0                                                              | 0              | 0          | 0          | 0                | -         | -         | -         |  |
| 15         | Side               | 1.00                        | 3.20      | Enclosed       | 0          | 0                                                              | 0              | -          | -          | -                | -         | -         | -         |  |
| 16         | Side               | 1.00                        | 3.20      | Enclosed       | 0          | 0                                                              | 0              | 0          | 0          | 0                | -         | -         | -         |  |

| Patient's information |     |                          |                                      |                     |     |                          |                                      |
|-----------------------|-----|--------------------------|--------------------------------------|---------------------|-----|--------------------------|--------------------------------------|
| At the sampling bed   |     |                          |                                      | At the other bed    |     |                          |                                      |
| Age                   | Sex | Diagnosis                | Laboratory confirmation of influenza | Age                 | Sex | Diagnosis                | Laboratory confirmation of influenza |
| 45                    | M   | URTI                     | Neg                                  | 76                  | M   | Influenza A              | A(H3)                                |
| 86                    | F   | Influenza A              | A(H3)                                | 33                  | F   | Bronchitis               | -                                    |
| 28                    | F   | Tonsillitis/ Pharyngitis | -                                    | 83                  | F   | Influenza A              | A(H3)                                |
| 68                    | F   | Pneumonia                | Neg                                  | 31                  | F   | Influenza A              | A(H3)                                |
| 58                    | M   | Influenza A              | A(H3)                                | No patient admitted |     |                          |                                      |
| 34                    | M   | Influenza A              | A(H3)                                | 12                  | M   | Influenza A              | A(H3)                                |
| 16                    | F   | Influenza A              | A(H3)                                | 72                  | F   | Influenza A, Pneumonitis | A(H3)                                |
| 73                    | F   | Influenza A              | A(H3)                                | 11                  | F   | Influenza B, Pneumonia   | B                                    |
| 73                    | F   | Influenza A              | A(H3)                                | No patient admitted |     |                          |                                      |
| 65                    | F   | Influenza A              | A(H3)                                | 68                  | F   | Pneumonia                | Neg                                  |
| -                     | -   | Bronchitis, URTI         | -                                    | 39                  | M   | Pharyngitis, URTI        | Neg                                  |
| 14                    | M   | Syncope, URTI            | Neg                                  | 93                  | M   | Pneumonia                | Neg                                  |
| 63                    | M   | Pneumonia                | Neg                                  | No patient admitted |     |                          |                                      |
| 53                    | M   | Influenza B              | B                                    | 56                  | M   | Pneumonia                | -                                    |
| 73                    | M   | Pneumonia                | Neg                                  | -                   | -   | -                        | -                                    |
| 79                    | M   | Myositis, Influenza B    | B                                    | 21                  | M   | Bronchitis, Syncope      | Neg                                  |

| Volume of the room (m <sup>3</sup> ) | Environmental factors |     |                       |     |                                          |     |
|--------------------------------------|-----------------------|-----|-----------------------|-----|------------------------------------------|-----|
|                                      | Temperature (°C)      |     | Relative humidity (%) |     | Absolute humidity (g/m <sup>3</sup> air) |     |
|                                      | Mean                  | SD  | Mean                  | SD  | Mean                                     | SD  |
| 70.53                                | 23.7                  | 0.3 | 35.4                  | 1.8 | 7.6                                      | 0.3 |
| 75.68                                | 22.4                  | 0.3 | 48.2                  | 0.6 | 9.6                                      | 0.2 |
| 75.68                                | 22.4                  | 0.1 | 49.7                  | 0.8 | 9.9                                      | 0.1 |
| 75.68                                | 24.2                  | 1.1 | 48.4                  | 2.3 | 10.7                                     | 0.4 |
| 70.53                                | 22.5                  | 0.5 | 44.4                  | 0.9 | 8.9                                      | 0.2 |
| 70.53                                | 24.6                  | 0.7 | 27.9                  | 1.4 | 6.3                                      | 0.2 |
| 70.53                                | 26                    | 0.6 | 42                    | 1.1 | 10.2                                     | 0.2 |
| 75.68                                | -                     | -   | -                     | -   | -                                        | -   |
| 75.68                                | -                     | -   | -                     | -   | -                                        | -   |
| 75.68                                | 23.5                  | 0.3 | 40.1                  | 0.9 | 8.5                                      | 0.1 |
| 70.53                                | 22.1                  | 0.2 | 37.4                  | 1.1 | 7.3                                      | 0.2 |
| 75.68                                | 20.9                  | 0.1 | 25.4                  | 0.8 | 4.7                                      | 0.2 |
| 70.53                                | 22.6                  | 0.5 | 44                    | 1.9 | 8.8                                      | 0.6 |
| 70.53                                | 25.5                  | 0.5 | 36.9                  | 1.5 | 8.8                                      | 0.2 |
| 70.53                                | 22.9                  | 0.2 | 54.9                  | 0.7 | 11.2                                     | 0.2 |
| 70.53                                | 23.7                  | 0.4 | 52.3                  | 1.9 | 11.2                                     | 0.3 |
